# Supplementary material for: Towards Forensic DNA Phenotyping for Predicting Visible Traits in Dogs
Source: Genes (Basel). 2021 Jun 11;12(6):908. doi: 10.3390/genes12060908 (PMC8230911; doi:10.3390/genes12060908)
Supplement: Supplementary file 1 [file genes-12-00908-s001.zip]

Archive with 7 entries (7 files):
- Figure S2.pdf
- Figures S1a-S1d .pdf
- Table S1.xlsx
- Table S2.xlsx
- Table S5.xlsx
- Tables S3a - S3c.xlsx
- Tables S4a - S4k.xlsx
