# Supplementary material for: Towards Forensic DNA Phenotyping for Predicting Visible Traits in Dogs
Source: Genes (Basel). 2021 Jun 11;12(6):908. doi: 10.3390/genes12060908 (PMC8230911; doi:10.3390/genes12060908)
Supplement: Supplementary file 1 [file genes-12-00908-s001.zip › Table S1.xlsx]

## Sheet: Table S1
Serial number	EXAMPLE002
Name	BOY
Date	2016-05-17
Sampler	JH
Source of sample	MOUTH SWAB
Declaration of consent	✓
Dog breed	CANICHE (POODLE)
Certification for breed	YES
Geographical origin	GERMANY
Geographical home	AUSTRIA
Age	8 YEARS
Determination of age	DETERMINED BY CERTIFICATE
Sex	MALE
Weight	10 kg
Determination of weight	DETERMINED BY DOG OWNER
Coat colour	SOLID BLACK
Coat pattern	NO PATTERN
Coat structure	LONG SMOOTH AND CURLY
Body size (height at withers)	40 cm
Tail length	16 - 20 cm
Dog skull (shape)	MESOCEPHALY (ANCESTRAL HEAD)
Ear morphology (shape)	DROP
Eye colour	BROWN
Nose colour	BLACK
Specific features / Additional notes	MINATURE POODLE
Foto front (head)	✓
Foto side (full body)	✓
Additional foto (specific features, etc. ridgeback)	✕
Table S1: Example of a completed sampling protocol.
