# Supplementary material for: Towards Forensic DNA Phenotyping for Predicting Visible Traits in Dogs
Source: Genes (Basel). 2021 Jun 11;12(6):908. doi: 10.3390/genes12060908 (PMC8230911; doi:10.3390/genes12060908)
Supplement: Supplementary file 1 [file genes-12-00908-s001.zip › Table S2.xlsx]

## Sheet: Table S2a
Marker ID	Chromosome	Position SNP CanFAM 3.1	F primer1	R primer1	Ta 1 (°C)	F primer2	R primer2	Ta 2 (°C)
MC1R_306ter	5	63694334	CTGCCACACTCACTATCCTGC	CTGCCCAGCACCCTGGCCTC	67	CCTCACCAGGAACATAGCAC	TTTTCTTTCTCTGCTGGGGC	60
MC1R_M264V	5	63694460	CTGCCACACTCACTATCCTGC	CTGCCCAGCACCCTGGCCTC	67	CCTCACCAGGAACATAGCAC	TTTTCTTTCTCTGCTGGGGC	60
CBD103_S54	16	58965449	TGTCTTCATCCCTGTGAGGT	CCAGGAGGCATTTTCACACT	58	GACCGCTCCTTATTCTGCAA	ACCAAAGCCTTCCTAAAGCT	59
CBD103_S53	16	58965395	TGTCTTCATCCCTGTGAGGT	CCAGGAGGCATTTTCACACT	58	GACCGCTCCTTATTCTGCAA	ACCAAAGCCTTCCTAAAGCT	59
ASIP_S82	24	23393510	CTGGCGTTTCCCTGCAGAA	CCGGGGACTTGCAGCTGTT	67	CTGGCGTTTCCCTGCAGAA	CCGGGGACTTGCAGCTGTT	67
ASIP_H83	24	23393514	CTGGCGTTTCCCTGCAGAA	CCGGGGACTTGCAGCTGTT	67	CTGGCGTTTCCCTGCAGAA	CCGGGGACTTGCAGCTGTT	67
ASIP_R96	24	23393552	CTGGCGTTTCCCTGCAGAA	CCGGGGACTTGCAGCTGTT	67	CTGGCGTTTCCCTGCAGAA	CCGGGGACTTGCAGCTGTT	67
ASIP_SINE	24	23365282	GCTAATTATCTTGTTGAGGA	GCCCATCAAAAGACACCATT	58	GTGATTAGTAGCTTCTCTCTTGC	GAGAATTTCAGGAAGATGGTCAG	65
TYRP_Q331ter	11	33326685	TGCAGGCACCGAGGATGGGCCAATTA	GCCTTCCACTGTGTTTCGGAAACTG	58	TGCAGGCACCGAGGATGGGCCAATTA	GCCTTCCACTGTGTTTCGGAAACTG	58
TYRP_345delP	11	33326727	TGCAGGCACCGAGGATGGGCCAATTA	GCCTTCCACTGTGTTTCGGAAACTG	58	TGCAGGCACCGAGGATGGGCCAATTA	GCCTTCCACTGTGTTTCGGAAACTG	58
MLPH_157471_c. -22G>A	25	48121642	CCTTCCTTCCCCTGTAGGAC	GCCTAAAATGAGCTCCCTGA	67	CGCCTTCCTTCCCCTGTA	ACCGTGGACCCTCCTTATG	61
MITF_SNP	20	21838204	GGTTGCTTCCTTCCGTACTAAAGC	CGATAATGATGAGGACAACAGACATTAC	58	GGTTGCTTCCTTCCGTACTAAAGC	CGATAATGATGAGGACAACAGACATTAC	58
MITF_INS	20	21836428	GGTTTAGGGTGGTTGAAGACCAG	TAAACCCTTTAACTTCCTCACAGCC	58	GTTTAGGGTGGTTGAAGACCAG	CCCTTTAACTTCCTCACAGCC	65
PMEL	10	292842	CAGTTTCTCCTTTATTCTCCCA	CCTCGGCAAATCACAGCA	58	ACGTGGTAGCTGGGGAA	GTCCATTGCTAATCAGTTTCTCC	65
PSMB7	9	58530295	GGCGAGTGGGTTTCTCTTGC	AACATAAGCCCTCCCTGACGG	67	CCCTGTTCTTTCAGAAATGCCG	GTTCCCGTCATCCGTCGT	65
FGF5	32	4509367	CCTCTTCTTCCTCCGTCTCC	CCAGGGTGCAAAACAACC	67	TTCCAGTGGAGCCCCTC	CCTGGGAGCCATTGACTTTG	61
RSPO2	13	8610420	TGGCTAAAGAAAACTTCCACAA	CCATCCCTGACTTACCATGACA	58	GGATTCAATGCAAATCCTAAAGT	GAGTCAAAAGCATCTTACCATAAG	58
KRT71	27	2541487	TCTGATAGTCAAGTCCTGAGACCA	AACTCATTTCCCCTCCAATTATG	58	ACAGAGGCCGTGTCCAC	TTTTGAGGTCATCCCCATGC	67
T-Box_C295G	1	54192143	AGAGCCTGCAGTACCGAGTG	CCGAGACTTCTCCCAGAAAA	67	GCCTACCTGCCGTTCTTGGTCA	AGCGAGAAGGGCGACCCC	67
IGF2BP2_BICFPJ1062878	34	18406142	GCCACCCTCTAGCTCAATG	GCATATACAGTTGATTACTATTTAC	58	GCCACCCTCTAGCTCAATG	GCATATACAGTTGATTACTATTTAC	58
IGF1R	3	41849479	AGATGACCAACCTCAAGGATATT	AGTCCTGCCATCCCACAAAG	58	CCCTAAGGAATGTGGGGACC	AAGGCGCAGAGAGAAAGCC	66
1 Primer and annealing temperature (Ta) used for pilot and blind test
2 Primer and annealing temperature (Ta) used for marker test
Positions of SNPs and INDEL according to CanFam 3.1 and primer sequences.
For the marker-test additional primers were designed for amplicons exceeding 350bp, when applying the original primers.

## Sheet: Table S2b
ASIP_SINE	CCTTTTTTTTTTTTTTCATTTATTTATGATAGTCACACAGAGAGAGAGAGAGAGAGAGGCAGAGACACAGGCAGAGGGAGAAGCAGGCTCCATGCACCGGGAGCCTGACGTGGGATTTGATCCCGGGTCTCCAGGATCGCGCCCTGGGCCAAAGGCAGGCGCTAAACCGCTGCGCCACCCAGGGATCCC
MITF_SINE	GGGATCCCTGGGTGGCGCAGCGGTTTAGCGCCTGCCTTTGGCCCAGGGCGCGATCCTGGAGACCAGGGATCGAATCCCACGTCGGGCTCCCAGTGCATGGAGCCTGCTTCTCCCTCTGCCTATGTCTCTGCCTCTCTCTCTCTCTCTCTGTGTGAATATCATAAATAAATAAATAAATAAAATTAAAAAAGAAAAAAA
PMEL_SINE1	TTTTTTTTTTTTTTTTTTTTTTTTTTTTTTTTTTTTTTTTTTTTTTTTTTTTTTTTTTTTTTTTTTTTTTTTAAATTTTTATTTATTTATGATAGTCACAGAGAGAGAGAGAGGCGCAGAGACACAGGCAGAGGGAGAAGCAGGCTCCATGCACCGGGAGCCCGACGTGGGATTCGATCCCGGGTCTCCAGGATCGCGCCCTGGGCCAAAGGCAGGCGCCAAACCGCTGCGCCACCCAGGGATCCC
RSPO2_Insertion	TTCTCATAATGATGTATTCATCATTATGAGAATATGAGAACATTCATATTCTCATAATGATTATAATGAACATAATGAACATAATGAACATAATGAACATAATGAACATAATGAACATAATGAACATAATGAACATAATGAACATTATGAGAATATGAGAACATTCA
1The oligo(dT) lengths spanning 25-105 base pairs [39]
