# Supplementary material for: Towards Forensic DNA Phenotyping for Predicting Visible Traits in Dogs
Source: Genes (Basel). 2021 Jun 11;12(6):908. doi: 10.3390/genes12060908 (PMC8230911; doi:10.3390/genes12060908)
Supplement: Supplementary file 1 [file genes-12-00908-s001.zip › Table S5.xlsx]

## Sheet: marker-test
Trait	Marker ID	genotype - phenotype assignment
Coat colour/Coat pattern	MC1R_306ter	AT0061	AT0271	AT0062	AT0183	AT0257	AT0152	AT0195	AT0203	AT0005	AT0138	AT0282	DE01_006	DE01_035	DE01_052	DE02_017	DE02_020
	MC1R_M264V	AT0061	AT0271	AT0062	AT0183	AT0257	AT0152	AT0195	AT0203	AT0005	AT0138	AT0282	DE01_006	DE01_035	DE01_052	DE02_017	DE02_020
	CBD103_S54	AT0061	AT0271	AT0062	AT0183	AT0257	AT0152	AT0195	AT0203	AT0005	AT0138	AT0282	DE01_006	DE01_035	DE01_052	DE02_017	DE02_020
	CBD103_S53	AT0061	AT0271	AT0062	AT0183	AT0257	AT0152	AT0195	AT0203	AT0005	AT0138	AT0282	DE01_006	DE01_035	DE01_052	DE02_017	DE02_020
	ASIP S82	AT0061	AT0271	AT0062	AT0183	AT0257	AT0152	AT0195	AT0203	AT0005	AT0138	AT0282	DE01_006	DE01_035	DE01_052*	DE02_017	DE02_020*
	ASIP H83	AT0061	AT0271	AT0062	AT0183	AT0257	AT0152	AT0195	AT0203	AT0005	AT0138	AT0282	DE01_006	DE01_035	DE01_052*	DE02_017	DE02_020*
	ASIP_SINE	AT0061	AT0271	AT0062	AT0183	AT0257	AT0152	AT0195	AT0203	AT0005	AT0138	AT0282	DE01_006	DE01_035	DE01_052*	DE02_017	DE02_020*
	ASIP_R96	AT0061	AT0271	AT0062	AT0183	AT0257	AT0152	AT0195	AT0203	AT0005	AT0138	AT0282	DE01_006	DE01_035	DE01_052*	DE02_017	DE02_020*
	TYRP_Q331ter	AT0061	AT0271	AT0062	AT0183	AT0257	AT0152	AT0195	AT0203	AT0005	AT0138	AT0282	DE01_006	DE01_035	DE01_052	DE02_017	DE02_020
	TYRP_345delP	AT0061	AT0271	AT0062	AT0183	AT0257	AT0152	AT0195	AT0203	AT0005	AT0138	AT0282	DE01_006	DE01_035	DE01_052	DE02_017	DE02_020
	MLPH_157471_c. -22G>A	AT0198	AT0095	AT0062	AT0183	AT0257	AT0230	AT0210	AT0249	AT0199	AT0138
	MITF_INS	AT0171	AT0287	AT0015	DE01_012	DE01_043	AT0101	AT0173	DE01_001	DE02_020	AT0134
	MITF_SNP	AT0171	AT0287	AT0015	DE01_012	DE01_043	AT0101	AT0173	DE01_001	DE02_020	AT0134
	PMEL	DE01_035	DE01_043	DE01_012	AT0264	AT0161	AT0085	AT0228	AT0230	DE02_066	AT0271
	PSMB7	AT0157	AT0158	AT0159	AT0160	AT0161	AT0173	DE01_001	AT0138	AT0210	AT0257
Coat structure	FGF5	AT0021	AT0241	AT0208	DE01_028	AT0133	AT0138	AT0282	AT0198	AT0265	AT0152
	RSPO2	AT0117	AT0145	AT0195	AT0249	AT0133	AT0138	AT0282	AT0198	AT0265	AT0152
	KRT71	DE02_042	DE01_046	DE01_042	DE01_028	DE02_031	AT0138	AT0282	AT0198	AT0265	AT0152
Tail length	T-Box_C295G	AT0210	AT0062	AT0056	AT0203	AT0202	AT0138	AT0282	AT0050	AT0198	AT0152
Ear shape	IGF2BP2_BICFPJ1062878	AT0210	DE02_026	AT0203	DE01_037	AT0101	AT0138	AT0282	DE01_028	AT0143	AT0274
Body size	IGF1R	AT0123	AT0210	DE02_026	AT0021	AT0241	AT0138	AT0282	AT0152	AT0229	AT0261
Heat maps for genotype – phenotype correlations of the dogs analysed in the marker-test and the blind-test.
The green color represents a match between the genetic prediction and the phenotype of the dog, orange indicates that the visible trait was not verifiable by means of the available photo documentation (blind-test), yellow represents inconclusive results, red is indicating contradictory results (no match), and blue indicates no result.
match
inconclusive
no match
no results
* - both dogs were not analysable in the ASIP sine marker; but as in both cases the A-locus did not express, the loss of the genotypicla data did not influence the genotyp-phenotyp interpretation.

## Sheet: blind-test
		genotype - phenotype assignment
Trait	Marker ID	D4925	D4926	D4927	D4928	D4929	D4930	D4931	D4933	D4934
Coat colour/Coat pattern	MC1R_306ter
	MC1R_M264V
	CBD103_S54
	CBD103_S53
	ASIP S82
	ASIP H83
	ASIP_SINE
	ASIP_R96
	TYRP_Q331ter
	TYRP_345delP
	MLPH_157471_c. -22G>A
	MITF_INS
	MITF_SNP
	PMEL
	PSMB7
Coat structure	FGF5
	RSPO2
	KRT71
Tail length	T-Box_C295G
Ear shape	IGF2BP2_BICFPJ1062878
Body size	IGF1R
Heat maps for genotype – phenotype correlations of the dogs analysed in the marker-test and the blind-test.
The green color represents a match between the genetic prediction and the phenotype of the dog, orange indicates that the visible trait was not verifiable by means of the available photo documentation (blind-test), yellow represents inconclusive results, red is indicating contradictory results (no match), and blue indicates no result.
match
inconclusive
no match
not veryfiable
