# Supplementary material for: Towards Forensic DNA Phenotyping for Predicting Visible Traits in Dogs
Source: Genes (Basel). 2021 Jun 11;12(6):908. doi: 10.3390/genes12060908 (PMC8230911; doi:10.3390/genes12060908)
Supplement: Supplementary file 1 [file genes-12-00908-s001.zip › Tables S3a - S3c.xlsx]

## Sheet:  table S3a pilot-test
		Sample ID	H14-0413	H14-0462	H14-0379	H14-0392	H14-0350	H14-0375	H14-0291	H14-0367	H14-0306	H14-0349	H14-0289	H14-0311
Marker ID	Possible State
MC1R_306ter	T or C	Genotype	T/T	C/C	C/C	T/T	C/C	C/C	C/C	C/C	C/C	C/C	T/C	T/C
		Phenotype	red,yellow,creme, white	black, brown	black, brown	red,yellow,creme, white	brown, black	brown, black	brown, black	brown, black	brown, black	brown, black	brown, black	brown, black
MC1R_M264V	A or G	Genotype	A/A	A/A	A/A	A/A	G/G	A/A	G/G	A/A	A/G	A/A	A/A	A/A
		Phenotype	no melanistic mask	no melanistic mask	no melanistic mask	no melanistic mask	melanistic mask	no melanistic mask	melanistic mask	no melanistic mask	melanistic mask	no melanistic mask	no melanistic mask	no melanistic mask
CBD103_S54	GGG or DelGGG	Genotype	GGG/GGG	GGG/GGG	GGG/GGG	GGG/GGG	GGG/DelGGG	GGG/DelGGG	GGG/GGG	GGG/GGG	GGG/DelGGG	GGG/GGG	GGG/GGG	GGG/GGG
CBD103_S53	G or C	Genotype	G/G	G/G	G/G	G/G	G/C	G/C	G/G	G/C	G/C	G/G	G/G	G/G
		Phenotype	-	ky/ky	ky/ky	-	ky/KB	ky/KB	ky/ky	ky/ky	ky/KB	ky/ky	ky/ky	ky/ky
ASIP_S82	T or G	Genotype	G/G	G/G	G/G	G/G	T/T	G/G	T/T	G/G	G/G	T/T	G/G	G/G
ASIP_H83	A or G	Genotype	G/G	G/G	G/G	G/G	A/A	G/G	A/A	G/G	G/G	A/A	G/G	G/G
ASIP_SINE	SINE or no SINE	Genotype	SINE/SINE	no SINE/no SINE	no SINE/no SINE	no SINE/no SINE	no SINE/no SINE	SINE/SINE	no SINE/ no SINE	no SINE/ no SINE	SINE/SINE	no SINE/ no SINE	SINE/SINE	SINE/SINE
ASIP_R96	C or T	Genotype	C/T	C/C	C/C	C/C	C/C	C/C	C/C	C/C	T/T	C/C	C/C	C/C
		Phenotype	-	aw/aw - agouti/wild type	aw/aw - agouti/wild type	-	-	-	Ay/Ay - fawn/sable	aw/aw - agouti/wild type	-	Ay/Ay - fawn/sable	at/at - tan points	at/at - tan points
TYRP_Q331ter	C or T	Genotype	C/C	C/C	C/C	C/C	C/C	C/C	C/C	C/C	C/C	C/C	C/C	C/T
TYRP_345delP	CCT or DelCCT	Genotype	CCT/CCT	CCT/CCT	CCT/CCT	CCT/CCT	CCT/CCT	CCT/CCT	CCT/CCT	CCT/CCT	CCT/CCT	CCT/CCT	CCT/CCT	CCT/CCT
		Phenotype	-	black	black	-	black	black	black	black	black	black	black	black
MLPH_157471_c. -22G>A	G or A	Genotype	G/G	G/G	G/G	G/A	G/G	G/G	G/G	G/G	G/G	G/G	G/G	A/A
		Phenotype	no dilution	no dilution	no dilution	no dilution	no dilution	no dilution	no dilution	no dilution	no dilution	no dilution	no dilution	dilution
MITF_INS	SINE or no SINE	Genotype	no SINE/no SINE	SINE/SINE	no SINE/no SINE	no SINE/no SINE	no SINE/no SINE	no SINE/no SINE	no SINE/no SINE	no SINE/no SINE	no SINE/no SINE	no SINE/no SINE	no SINE/no SINE	no SINE/no SINE
		Phenotype	solid,minimal white spotting	white spotting	solid,minimal white spotting	solid,minimal white spotting	solid,minimal white spotting	solid,minimal white spotting	solid,minimal white spotting	solid,minimal white spotting	solid,minimal white spotting	solid,minimal white spotting	solid,minimal white spotting	solid,minimal white spotting
MITF_SNP	A or G	Genotype	G/G	A/A	A/A	G/G	G/G	G/G	G/A	A/A	G/G	A/A	G/G	G/G
		Phenotype	solid,minimal white spotting	white spotting	white spotting	solid,minimal white spotting	solid,minimal white spotting	solid,minimal white spotting	white spotting	white spotting	solid,minimal white spotting	white spotting	solid,minimal white spotting	solid,minimal white spotting
PMEL	SINE or no SINE	Genotype	no SINE/no SINE	no SINE/no SINE	no SINE/no SINE	no SINE/no SINE	no SINE/no SINE	no SINE/no SINE	no SINE/no SINE	no SINE/no SINE	no SINE/no SINE	no SINE/no SINE	no SINE/no SINE	no SINE/no SINE
		Phenotype	no merle	no merle	no merle	no merle	no merle	no merle	no merle	no merle	no merle	no merle	no merle	no merle
PSMB7	G or T	Genotype	T/T	T/T	T/T	T/T	T/T	T/T	T/T	T/T	T/T	T/T	T/T	T/T
		Phenotype	no harlequin	no harlequin	no harlequin	no harlequin	no harlequin	no harlequin	no harlequin	no harlequin	no harlequin	no harlequin	no harlequin	no harlequin
FGF5	G or T	Genotype	T/G	G/G	G/G	T/G	G/G	T/T	G/G	G/G	G/G	G/G	G/T	G/G
		Phenotype	short hair	short hair	short hair	short hair	short hair	long hair	short hair	short hair	short hair	short hair	short hair	short hair
RSPO2	no Ins or Ins	Genotype	No Ins/ No Ins	No Ins/ No Ins	No Ins/ No Ins	No Ins/ No Ins	No Ins/No Ins	Ins/Ins	No Ins/ No Ins	No Ins/ No Ins	Ins/Ins	Ins/Ins	No Ins/ No Ins	No Ins/ No Ins
		Phenotype	no furnishings	no furnishings	no furnishings	no furnishings	no furnishings	furnishings	no furnishings	no furnishings	furnishings	furnishings	no furnishings	no furnishings
KRT71	A or G	Genotype	A/A	A/A	A/A	A/A	A/A	G/G	A/A	A/A	A/A	A/A	G/G	A/A
		Phenotype	smooth	smooth	smooth	smooth	smooth	curly	smooth	smooth	smooth	smooth	curly	smooth
T-Box_C295G	G or C	Genotype	C/C	C/C	C/C	C/C	C/C	C/C	C/C	C/C	C/C	C/C	C/C	C/C
		Phenotype	long tail	long tail	long tail	long tail	long tail	long tail	long tail	long tail	long tail	long tail	long tail	long tail
IGF2BP2_BICFPJ1062878	G or A	Genotype	A/A	G/A	G/A	A/A	G/G	G/G	G/A	G/A	G/G	G/G	G/G	G/G
		Phenotype	drop ears	inconclusive	inconclusive	drop ears	non drop ears	no drop ears	inconclusive	inconclusive	non drop ears	non drop ears	non drop ears	non drop ears
IGF1R	G or A	Genotype	G/G	G/G	G/G	G/G	G/G	A/A	G/G	G/G	G/G	G/G	G/G	G/G
		Phenotype	rather tall	rather tall	rather tall	rather tall	rather tall	rather small	rather tall	rather tall	rather tall	rather tall	rather tall	rather tall
Tables S3a
Genotypes for all tested markers and dog samples analysed in the course of the pilot-test. The resulting phenotypes are listed below the corresponding genotype entries.

## Sheet: table S3b marker-test
Marker ID	Possible State	Sample ID	AT0061	AT0271	AT0062	AT0183	AT0257	AT0152	AT0195	AT0203	AT0005	AT0138	AT0282	DE01_006	DE01_035	DE01_052	DE02_017	DE02_020
MC1R_306ter	T or C	Genotype	C/C	C/C	C/C	C/C	C/C	C/C	C/C	C/C	T/C	C/C	C/C	C/C	C/C	C/C	C/C	T/T
		Phenotype	brown, black	brown, black	brown, black	brown, black	brown, black	brown, black	brown, black	brown, black	brown, black	brown, black	brown, black	brown, black	brown, black	brown, black	brown, black	red,yellow,creme, white
		Sample ID	AT0061	AT0271	AT0062	AT0183	AT0257	AT0152	AT0195	AT0203	AT0005	AT0138	AT0282	DE01_006	DE01_035	DE01_052	DE02_017	DE02_020
MC1R_M264V	A or G	Genotype	A/A	G/G	G/G	A/A	G/G	A/G	G/G	A/A	A/A	A/G	A/A	A/A	A/G	A/A	A/G	A/A
		Phenotype	no melanistic mask	melanistic mask	melanistic mask	no melanistic mask	melanistic mask	melanistic mask	melanistic mask	no melanistic mask	no melanistic mask	melanistic mask	no melanistic mask	no melanistic mask	melanistic mask	no melanistic mask	melanistic mask	no melanistic mask
		Sample ID	AT0061	AT0271	AT0062	AT0183	AT0257	AT0152	AT0195	AT0203	AT0005	AT0138	AT0282	DE01_006	DE01_035	DE01_052	DE02_017	DE02_020
CBD103_S54	GGG or DelGGG	Genotype	GGG/GGG	GGG/GGG	GGG/DelGGG	GGG/DelGGG	GGG/DelGGG	GGG/GGG	GGG/GGG	GGG/GGG	DelGGG/DelGGG	DelGGG/DelGGG	DelGGG/DelGGG	DelGGG/DelGGG	DelGGG/DelGGG	DelGGG/DelGGG	DelGGG/DelGGG	DelGGG/DelGGG
CBD103_S53	G or C	Genotype	G/G	G/G	G/C	G/C	G/C	G/G	G/G	G/G	C/C	C/C	C/C	C/C	C/C	C/C	C/C	C/C
		Phenotype	ky/ky	ky/ky	ky/KB	ky/KB	ky/KB	ky/ky	ky/ky	ky/ky	KB/KB	KB/KB	KB/KB	KB/KB	KB/KB	KB/KB	KB/KB	-
		Sample ID	AT0061	AT0271	AT0062	AT0183	AT0257	AT0152	AT0195	AT0203	AT0005	AT0138	AT0282	DE01_006	DE01_035	DE01_052	DE02_017	DE02_020
ASIP_S82	T or G	Genotype	G/G	G/G	T/T	T/T	T/T	T/T	T/T	T/T	G/G	G/G	G/G	G/G	G/G	G/G	G/G	G/G
ASIP_H83	A or G	Genotype	G/G	G/G	A/A	A/A	A/A	A/A	A/A	A/A	G/G	G/G	G/G	G/G	G/G	G/G	G/G	G/G
ASIP_SINE	SINE or no SINE	Genotype	no SINE/ no SINE	no SINE/ no SINE	no SINE/ no SINE	no SINE/ no SINE	no SINE/ no SINE	no SINE/ no SINE	no SINE/ no SINE	no SINE/ no SINE	no SINE/ no SINE	SINE/SINE	SINE/SINE	no result	SINE/SINE	no result	SINE/SINE	no result
ASIP_R96	C or T	Genotype	C/C	C/C	C/C	C/C	C/C	C/C	C/C	C/C	C/T	C/C	C/T	C/T	C/C	C/C	C/C	C/C
		Phenotype	aw/aw - agouti/wild type	aw/aw - agouti/wild type	-	-	-	Ay/Ay - fawn/sable	Ay/Ay - fawn/sable	Ay/Ay - fawn/sable	-	-	-	-	-	-	-	-
		Sample ID	AT0061	AT0271	AT0062	AT0183	AT0257	AT0152	AT0195	AT0203	AT0005	AT0138	AT0282	DE01_006	DE01_035	DE01_052	DE02_017	DE02_020
TYRP_Q331ter	C or T	Genotype	C/T	C/C	C/C	C/C	C/C	C/C	C/C	C/C	T/T	C/T	C/T	C/T	C/C	C/T	C/C	C/T
TYRP_345delP	CCT or DelCCT	Genotype	CCT/CCT	CCT/CCT	CCT/CCT	CCT/CCT	CCT/CCT	CCT/CCT	CCT/CCT	CCT/CCT	CCT/CCT	CCT/CCT	CCT/CCT	CCT/CCT	CCT/CCT	CCT/CCT	CCT/CCT	CCT/CCT
		Phenotype	black	black	black	black	black	black	black	black	brown or black	black	black	black	black	black	black	-
		Sample ID	AT0198	AT0095	AT0062	AT0183	AT0257	AT0230	AT0210	AT0249	AT0199	AT0138
MLPH_157471_c. -22G>A	G or A	Genotype	A/A	G/G	G/G	G/G	G/G	G/G	G/G	G/G	A/A	A/A
		Phenotype	diluted	not diluted	not diluted	not diluted	not diluted	not diluted	not diluted	not diluted	diluted	diluted
		Sample ID	AT0171	AT0287	AT0015	DE01_012	DE01_043	AT0101	AT0173	DE01_001	DE02_020	AT0134
MITF_INS	SINE or no SINE	Genotype	SINE/SINE	SINE/SINE	no SINE/no SINE	no SINE/SINE	no SINE/no SINE	no SINE/no SINE	no SINE/no SINE	no SINE/no SINE	no SINE/no SINE	no result
		Phenotype	white spotting	white spotting	solid, minimal white spotting	pseudo irish spotting	solid, minimal white spotting	solid, minimal white spotting	solid, minimal white spotting	solid, minimal white spotting	solid, minimal white spotting
		Sample ID	AT0171	AT0287	AT0015	DE01_012	DE01_043	AT0101	AT0173	DE01_001	DE02_020	AT0134
MITF_SNP	A or G	Genotype	A/A	A/A	A/G	A/G	G/G	G/G	G/G	G/G	G/G	no result
		Phenotype	white spotting	white spotting	white spotting	white spotting	no white spotting	no white spotting	no white spotting	no white spotting	no white spotting
		Sample ID	DE01_035	DE01_043	DE01_012	AT0264	AT0161	AT0085	AT0228	AT0230	DE02_066	AT0271
PMEL	SINE or no SINE	Genotype	no SINE/SINE	no SINE/SINE	no SINE/SINE	no SINE/SINE	no SINE/SINE	No SINE/No SINE	No SINE/No SINE	No SINE/No SINE	No SINE/No SINE	No SINE/No SINE
		Phenotype	merle	merle	merle	merle	merle	no merle	no merle	no merle	no merle	no merle
		Sample ID	AT0157	AT0158	AT0159	AT0160	AT0161	AT0173	DE01_001	AT0138	AT0210	AT0257
PSMB7	G or T	Genotype	T/G	T/G	T/G	T/G	T/G	T/T	T/T	T/T	T/T	T/T
		Phenotype	harlequin	harlequin	harlequin	harlequin	harlequin	no harlequin	no harlequin	no harlequin	no harlequin	no harlequin
		Sample ID	AT0021	AT0241	AT0208	DE01_028	AT0133	AT0138	AT0282	AT0198	AT0265	AT0152
FGF5	G or T	Genotype	T/T	T/T	T/T	T/T	T/T	G/G	G/G	G/G	G/G	G/G
		Phenotype	long hair	long hair	long hair	long hair	long hair	short hair	short hair	short hair	short hair	short hair
		Sample ID	AT0117	AT0145	AT0195	AT0249	AT0133	AT0138	AT0282	AT0198	AT0265	AT0152
RSPO2	no Ins or Ins	Genotype	Ins/ Ins	no Ins/Ins	Ins/ Ins	Ins/ Ins	Ins/ Ins	No Ins/ No Ins	No Ins/ Ins	No Ins/ No Ins	No Ins/ No Ins	No Ins/No Ins
		Phenotype	furnishings/	furnishings	furnishings	furnishings	furnishings	no furnishings	furnishings	no furnishings	no furnishings	furnishings
		Sample ID	DE02_042	DE01_046	DE01_042	DE01_028	DE02_031	AT0138	AT0282	AT0198	AT0265	AT0152
KRT71	A or G	Genotype	G/G	G/G	G/A	G/G	G/A	A/A	G/G	A/A	A/A	A/A
		Phenotype	curly	curly	wavy	curly	wavy	smooth	curly	smooth	smooth	smooth
		Sample ID	AT0210	AT0062	AT0056	AT0203	AT0202	AT0138	AT0282	AT0050	AT0198	AT0152
T-Box_C295G	G or C	Genotype	C/C	C/C	C/C	C/G	C/G	C/C	C/C	C/C	C/C	C/C
		Phenotype	long tail	long tail	long tail	bobtail	bobtail	long tail	long tail	long tail	long tail	long tail
		Sample ID	AT0210	DE02_026	AT0203	DE01_037	AT0101	AT0138	AT0282	DE01_028	AT0143	AT0274
IGF2BP2_BICFPJ1062878	G or A	Genotype	G/A	G/G	A/A	G/A	G/A	A/A	G/A	G/A	G/A	no result
		Phenotype	inconclusive	non drop ears	drop ears	inconclusive	inconclusive	drop ears	inconclusive	inconclusive	inconclusive	no result
		Sample ID	AT0123	AT0210	DE02_026	AT0021	AT0241	AT0138	AT0282	AT0152	AT0229	AT0261
IGF1R	G or A	Genotype	G/G	G/G	G/A	G/A	G/G	G/G	G/G	G/G	G/G	G/G
		Phenotype	rather tall	rather tall	rather small	rather small	rather tall	rather tall	rather tall	rather tall	rather tall	rather tall
Tables S3b
Genotypes for all tested markers and dog samples analysed in the course of the marker-test. The resulting phenotypes are listed below the corresponding genotype entries.
DE01_052 and DE02_020 gave no results in the ASIP SINE marker, AT0134 gave no result in both “MITF” markers, and no result was obtained in the “IGF2BP2” marker for AT0274.

## Sheet: table S3c blind-test
		Sample ID	D4925	D4926	D4927	D4928	D4929	D4930	D4931	D4933	D4934
Marker ID	Possible State
MC1R_306ter	T or C	Genotype	C/C	C/C	T/C	C/C	C/C	T/T	C/C	C/C	C/C
		Phenotype	brown,black	brown,black	brown,black	brown,black	brown,black	red,yellow,creme, white	brown,black	brown,black	brown,black
MC1R_M264V	A or G	Genotype	A/G	A/A	A/G	A/A	A/A	A/A	A/A	A/G	G/G
		Phenotype	melanistic mask	no melanistic mask	melanistic mask	no melanistic mask	no melanistic mask	no melanistic mask	no melanistic mask	melanistic mask	melanistic mask
CBD103_S54	GGG or DelGGG	Genotype	GGG/GGG	GGG/GGG	GGG/GGG	GGG/GGG	GGG/GGG	GGG/GGG	GGG/GGG	GGG/DelGGG	GGG/GGG
CBD103_S53	G or C	Genotype	G/G	G/G	G/G	G/G	G/G	G/G	G/G	G/C	G/G
		Phenotype	ky/ky	ky/ky	ky/ky	ky/ky	ky/ky	-	ky/ky	ky/KB	ky/ky
ASIP_S82	T or G	Genotype	T/G	G/G	G/G	G/G	T/G	T/G	G/G	T/T	T/T
ASIP_H83	A or G	Genotype	A/G	G/G	G/G	G/G	A/G	A/G	G/G	A/A	A/A
ASIP_SINE	SINE or no SINE	Genotype	SINE/no SINE	SINE/SINE	SINE/SINE	SINE/SINE	SINE/no SINE	SINE/no SINE	SINE/SINE	no SINE/no SINE	no SINE/no SINE
ASIP_R96	C or T	Genotype	C/C	C/C	C/C	C/C	C/C	C/C	C/C	C/C	C/C
		Phenotype	Ay/at - fawn/sable	at/at - tan points	at/at - tan points	at/at - tan points	Ay/at - fawn/sable	-	at/at - tan points	-	Ay/Ay - fawn/sable
TYRP_Q331ter	C or T	Genotype	C/C	C/C	C/C	C/C	C/C	C/C	C/C	C/C	C/C
TYRP_345delP	CCT or DelCCT	Genotype	CCT/CCT	CCT/CCT	CCT/CCT	CCT/CCT	CCT/CCT	CCT/CCT	CCT/CCT	CCT/CCT	CCT/CCT
		Phenotype	black	black	black	black	black	-	black	black	black
MLPH_157471_c. -22G>A	G or A	Genotype	G/G	G/G	G/G	G/G	G/G	A/A	G/G	G/G	G/G
		Phenotype	no dilution	no dilution	no dilution	no dilution	no dilution	dilution	no dilution	no dilution	no dilution
MITF_INS	SINE or no SINE	Genotype	SINE/SINE	no SINE/no SINE	no SINE/no SINE	no SINE/no SINE	SINE/SINE	SINE/SINE	no SINE/no SINE	no SINE/no SINE	no SINE/no SINE
		Phenotype	white spotting	solid, minimal white spotting	solid, minimal white spotting	solid, minimal white spotting	white spotting	white spotting	solid, minimal white spotting	solid, minimal white spotting	solid, minimal white spotting
MITF_SNP	A or G	Genotype	A/G	G/G	G/G	G/G	A/A	A/A	G/G	G/G	G/G
		Phenotype	white spotting	no white spotting	no white spotting	no white spotting	white spotting	white spotting	no white spotting	no white spotting	no white spotting
PMEL	SINE or no SINE	Genotype	no SINE/no SINE	no SINE/no SINE	no SINE/no SINE	no SINE/no SINE	no SINE/no SINE	SINE/SINE	no SINE/no SINE	no SINE/no SINE	no SINE/no SINE
		Phenotype	no merle	no merle	no merle	no merle	no merle	double merle	no merle	no merle	no merle
PSMB7	G or T	Genotype	T/T	T/T	T/T	T/T	T/T	T/T	T/T	T/T	T/T
		Phenotype	no harlequin	no harlequin	no harlequin	no harlequin	no harlequin	no harlequin	no harlequin	no harlequin	no harlequin
FGF5	G or T	Genotype	G/G	T/T	T/T	T/T	T/G	T/T	T/T	G/G	G/G
		Phenotype	short hair	long hair	long hair	long hair	short hair	long hair	long hair	short hair	short hair
RSPO2	no Ins or Ins	Genotype	No Ins/ No Ins	No Ins/ No Ins	No Ins/ No Ins	No Ins/ No Ins	No Ins/Ins	Ins/Ins	No Ins/ No Ins	No Ins/ No Ins	No Ins/ No Ins
		Phenotype	no furnishings	no furnishings	no furnishings	no furnishings	furnishings	furnishings	no furnishings	no furnishings	no furnishings
KRT71	A or G	Genotype	A/A	A/A	A/A	A/A	G/A	G/A	A/A	A/A	A/A
		Phenotype	smooth	smooth	smooth	smooth	wavy	wavy	smooth	smooth	smooth
T-Box_C295G	G or C	Genotype	C/C	C/C	C/C	C/C	C/C	C/C	C/C	C/C	C/C
		Phenotype	long tail	long tail	long tail	long tail	long tail	long tail	long tail	long tail	long tail
IGF2BP2_BICFPJ1062878	G or A	Genotype	G/G	A/A	A/A	A/A	G/G	G/A	G/A	G/G	G/A
		Phenotype	non drop ears	drop ears	drop ears	drop ears	non drop ears	inconclusive	inconclusive	non drop ears	inconclusive
IGF1R	G or A	Genotype	G/G	G/G	G/G	G/G	G/A	G/G	G/G	G/A	G/G
		Phenotype	rather tall	rather tall	rather tall	rather tall	rather small	rather tall	rather tall	rather small	rather tall
Tables S3c
Genotypes for all tested markers and dog samples analysed in the course of the blind-test. The resulting phenotypes are listed below the corresponding genotype entries.
