# Supplementary material for: Towards Forensic DNA Phenotyping for Predicting Visible Traits in Dogs
Source: Genes (Basel). 2021 Jun 11;12(6):908. doi: 10.3390/genes12060908 (PMC8230911; doi:10.3390/genes12060908)
Supplement: Supplementary file 1 [file genes-12-00908-s001.zip › Tables S4a - S4k.xlsx]

## Sheet: Table S4a E-Locus
E-Locus
MC1R_306ter	MC1R_M264V
Nucleotide (Genotype definition)	Nucleotide (Genotype definition)	Possible phenotypical expressions
C/C (E/E)	A/A (E/E)	brown,black/no melanistic mask
	A/G (E/Em)	brown,black/melanistic mask
	G/G (Em/Em)	brown,black/melanistic mask
C/T (E/e)	A/A (E/E)	brown,black/no melanistic mask
	A/G (E/Em)	brown,black/melanistic mask
	G/G (Em/Em)	brown,black/melanistic mask
T/T (e/e)	A/A (E/E)	red,yellow,creme, white*/no melanistic mask
	A/G (E/Em)	red,yellow,creme, white*/melanistic mask
	G/G (Em/Em)	red,yellow,creme, white*/melanistic mask
* sometimes the coat color can be white
() - Genotype definition
Tables S4a to S4k: all allelic states of the markers are listed as well as the phenotypes that can be deduced from the particular genotype.
Additional information:
E-Locus (S4a): The melanistic mask is expressed only in genetically sable, tan-pointed, saddled or agouti dogs, which means that the mask's expression depends on genes on the A and K locus, while in dominant black dogs it will not be present. In some breeds, the mask can cover a large part of the body, covering chest and legs, while in others extreme masking can "hide" tan points.
K-Locus (S4b): The coat pattern brindling is not apparent in e/e animals, because MC1R is epistatic not only to KB but also to kbr. [28]. There are three K locus genes: K (dominant black),kbr (brindle) and k (non-solid black - allows A locus to be expressed). The genes are expressed in the following order: K> kbr>ky. Brindle usually appears as black stripes (eumelanin) on a red base (phaeomelanin…
M-Locus and H-Locus (S4g): Hidden merles also possess the M allele; however, phenotypic appearance of the merle pattern is inhibited by the recessive epistasis of mutations in the MC1R (melanocortin receptor) locus formerly known as E-locus [41].

## Sheet: Table S4b K-Locus
K-Locus
CBD103_S53	CBD103_S54
Nucleotide (Genotype definition)	Nucleotide (Genotype definition)	Possible phenotypical expressions
C/C (KB/KB)	DELGGG/DELGGG (KB/KB)	black,brown,blue
G/C (ky/KB)	GGG/DELGGG (ky/KB)	black/(it can be brindled)
G/G (ky/ky)	GGG/GGG (ky/ky)	A-Locus expresses
() - Genotype definition

## Sheet: Table S4c A-Locus
A-Locus
ASIP_Ay	ASIP_aw	ASIP_at	ASIP_a
S82/H83/SINE/R96	S82/H83/SINE/R96	S82/H83/SINE/R96	S82/H83/SINE/R96
Ay/Ay. Ay/aw, Ay/at, Ay/a	aw/aw, aw/at, aw/a	at/at, at/a	a/a
T/T A/A -/- C/C	G/G G/G -/- C/C	G/G G/G SINE/SINE C/C	G/G G/G SINE/SINE T/T
T/T A/A -/- T/T	G/G G/G -/- T/T	G/G G/G SINE/SINE T/C
T/T A/A -/- C/T	G/G G/G -/- T/C
T/G A/G -/- C/C	G/G G/G -/SINE C/C
T/G A/G -/- T/T	G/G G/G -/SINE T/T
T/G A/G -/- C/T	G/G G/G -/SINE TC
fawn/sable	wild type/agouti	tan points	recessive black
A-Locus	Ay	aw	at	a
	A82S, A83H, SINE, R96C	A82S, A83H, SINE, R96C	A82S, A83H, SINE, R96C	A82S, A83H, SINE, R96C
	T, A, -, C	T, A, -, C	T, A, -, C	T, A, -, C
Ay	T, A, -, C	G, G, -, C	G, G, SINE, C	G, G, SINE, T
	G, G, -, C	G, G, -, C	G, G, -, C	G, G, -, C
aw	T, A, -, C	G, G, -, C	G, G, SINE, C	G, G, SINE, T
	G, G, SINE, C	G, G, SINE, C	G, G, SINE, C	G, G, SINE, C
at	T, A, -, C	G, G, -, C	G, G, SINE, C	G, G, SINE, T
	G, G, SINE, T	G, G, SINE, T	G, G, SINE, T	G, G, SINE, T
a	T, A, -, C	G, G, -, C	G, G, SINE, C	G, G, SINE, T
	A82S	A83H	SINE	R96C
Ay	T	A	-	C	fawn/sable
aw	G	G	-	C	wild type/agouti
at	G	G	SINE	C	tan points
a	G	G	SINE	T	recessive black
Alleles ordered hierarchically: Ay>aw>at>a

## Sheet: Table S4d B-Locus
B-Locus
TYRP_Q331ter	TYRP_345delP
Nucleotide (Genotype definition)	Nucleotide (Genotype definition)	Possible phenotypical expressions
C/C (B/B)	CCT/CCT (B/B)	black
T/T (bs/bs)	delCCT/delCCT (bd/bd)	brown
C/T (B/bs)	CCT/delCCT (B/bd)	black
() - Genotype definition

## Sheet: Table S4e D-Locus
D-Locus
MLPH_157471_c. -22G>A
Nucleotide (Genotype definition)	Possible phenotypical expressions
A/A (d/d)	dilutes all pigments
A/G (d/D)	no dilution
G/G (D/D)	no dilution
() - Genotype definition

## Sheet: Table S4f S-Locus
S-Locus
MITF_Sine	MITF_SNP
Nucleotide (Genotype definition)	Nucleotide (Genotype definition)	Possible phenotypical expressions
No SineIns/No SineIns (S/S)	G/G (S/S)	solid,minimal white spotting
No SineIns/SineIns (S/Sp)	G/A (S/S)	white spotting, pseudo irish spotting
SineIns/SineIns (Sp/Sp)	A/A (S/S)	white spotting
() - Genotype definition	SNP Pos CanFam 3.1: 21838204

## Sheet: Table S4g M&H Loci
M-Locus			H-Locus
PMEL			PSMB7
Nucleotide (Genotype definition)	Possible phenotypical expressions		Nucleotide (Genotype definition)	Possible phenotypical expressions	Note
no SineIns/no SineINS (m/m)	no merle		T/T (h/h)	kein Harlequin
no SineIns/SineINS (m/M)	merle, mild merle		G/T (H/h)	Harlequin
SineINS/SineINS (M/M)	double merle		G/G (H/H)	Harlequin	lethal
() - Genotype definition			() - Genotype definition
			SNP Pos CanFam 3.1: 21838204

## Sheet: Table S4h Furnishings
Furnishings
FGF5		RSPO2		KRT71**
Genotype definition	Possible phenotypical expressions	Genotype definition	Possible phenotypical expressions	Genotype definition	Possible phenotypical expressions
G*/G*	short hair	Ins*/Ins*	furnishing	A/A	smooth coat
T/G*	short hair	no Ins/Ins*	furnishing	A/G	wavy coat
T/T	long hair	no Ins/no Ins	no furnishing	G/G	curly coat
* dominant		* dominant		** semi dominant
SNP Pos CanFam 3.1: 4509367		SNP Pos CanFam 3.1: 8610420		SNP Pos CanFam 3.1: 2541487

## Sheet: Table S4i Tail length
Tail length
T-Box_C295G
Genotype definition	Possible phenotypical expressions	Note
G*/G*	bobtail	lethal
C/G*	bobtail
C/C	long tail
* dominant

## Sheet: Table S4j Ear shape
Ear shape
BICFPJ1062878
Genotype definition	Possible phenotypical expressions
G/G	non drop ears
A/G	inconclusive
A/A	drop ears

[truncated: 1 more sheets: Table S4k Body Size]
